# Supplementary material
Source: Springer Nature journal article supplement (https://www.springermedizin.de/resource/supplementary/13048_2013_236_MOESM4_ESM.pdf/9665192)

Additional fig.3 protein synthesis in HOC-7 ovarian cancer cells

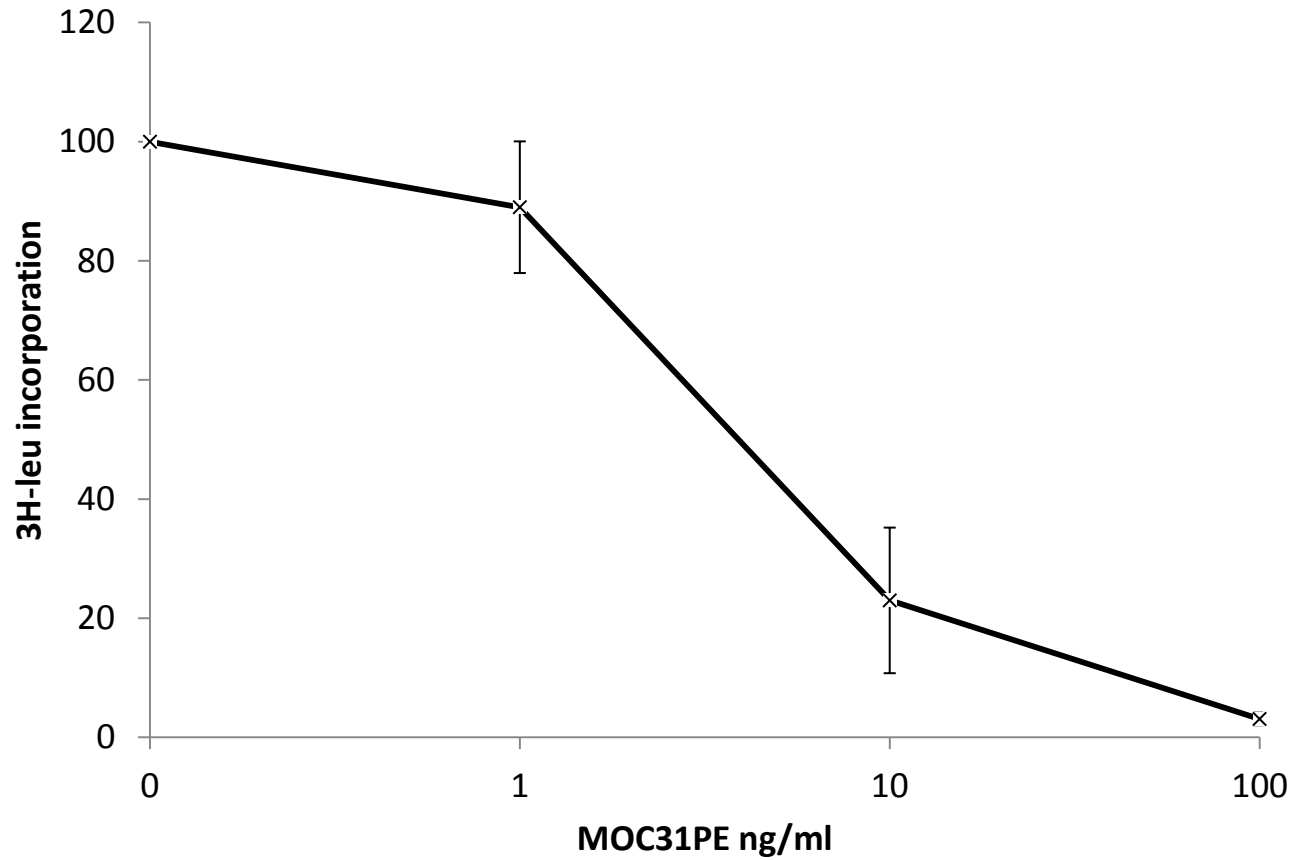

Supplement: MOESM4 [file 9665192]
